# Supplementary material
Source: PubMed Central journal article supplement (PMC2597393)
Supplement: NIHMS64099-supplement-1si20060118_02.pdf [file NIHMS64099-supplement-1si20060118_02.pdf]

**Supporting Information**

Antitumor Agents 250. Design and Synthesis of New Curcumin Analogs as Potential  
Anti-Prostate Cancer Agents

Li Lin, Qian Shi, Alexander K. Nyarko, Kenneth F. Bastow, Chin-Chung Wu,  
Ching-Yuan Su, Charles C.-Y Shih, and Kuo-Hsiung Lee

Elemental analysis data for new compounds

**Table S1.** The results of elemental analysis

| <b>Cmpd</b> | <b>Formula</b>                   | <b>Theoretical</b>         | <b>Found</b>               |
|-------------|----------------------------------|----------------------------|----------------------------|
| <b>8</b>    | $C_{14}H_{16}O_4 \cdot 1/8H_2O$  | C: 67.12; H: 6.54          | C: 66.93; H: 6.48          |
| <b>9</b>    | $C_{15}H_{18}O_5$                | C: 64.74; H: 6.52          | C: 64.56; H: 6.45          |
| <b>10</b>   | $C_{15}H_{18}O_5$                | C: 64.74; H: 6.52          | C: 64.72; H: 6.69          |
| <b>11</b>   | $C_{18}H_{22}O_6 \cdot 7/4H_2O$  | C: 59.08; H: 7.02          | C: 59.06; H: 6.78          |
| <b>12</b>   | $C_{17}H_{16}O_6$                | C: 64.55; H: 5.10          | C: 64.45; H: 5.12          |
| <b>13</b>   | $C_{19}H_{18}O_6 \cdot 3/4H_2O$  | C: 64.13; H: 5.52          | C: 64.03; H: 5.49          |
| <b>14</b>   | $C_{18}H_{16}O_4S \cdot 1/2H_2O$ | C: 64.08; H: 5.08; S: 9.50 | C: 64.15; H: 5.07; S: 9.41 |
| <b>15</b>   | $C_{18}H_{17}NO_4 \cdot H_2O$    | C: 65.64; H: 5.81; N: 4.25 | C: 65.64; H: 5.58; N: 3.97 |
| <b>17</b>   | $C_{23}H_{24}O_6 \cdot 1/4H_2O$  | C: 68.90; H: 6.16          | C: 68.86; H: 6.21          |
| <b>18</b>   | $C_{25}H_{28}O_8$                | C: 65.78; H: 6.18          | C: 65.53; H: 6.17          |
| <b>19</b>   | $C_{25}H_{28}O_8$                | C: 65.78; H: 6.18          | C: 65.44; H: 6.46          |
| <b>20</b>   | $C_{36}H_{44}O_{10}$             | C, 67.91; H, 6.97.         | C, 67.56; H, 7.24.         |
| <b>21</b>   | $C_{31}H_{36}O_8 \cdot 1/4H_2O$  | C, 68.81; H, 6.80.         | C, 68.86; H, 6.83.         |
| <b>23</b>   | $C_{31}H_{36}O_6$                | C, 73.79; H, 7.19          | C, 73.75; H, 7.20          |
| <b>25</b>   | $C_{21}H_{20}O_4 \cdot 1/4H_2O$  | C: 73.99; H: 6.06          | C: 74.01; H: 6.13          |
| <b>26</b>   | $C_{23}H_{24}O_4 \cdot 1/8H_2O$  | C: 75.34; H: 6.67          | C: 75.10; H: 6.59          |
| <b>29</b>   | $C_{24}H_{26}O_7 \cdot 1/2H_2O$  | C: 66.19; H: 6.25          | C: 66.08; H: 6.39          |
| <b>30</b>   | $C_{24}H_{26}O_7 \cdot 1/4H_2O$  | C: 66.89; H: 6.20.         | C: 66.80; H: 6.20          |
| <b>31</b>   | $C_{28}H_{30}O_8 \cdot 1/4H_2O$  | C: 66.59; H: 6.31          | C: 66.49; H: 6.34          |
| <b>35</b>   | $C_{25}H_{24}O_6$                | C: 71.41; H: 5.75          | C: 71.70; H: 5.53          |

|           |                                  |                             |                             |
|-----------|----------------------------------|-----------------------------|-----------------------------|
| <b>36</b> | $C_{30}H_{32}O_8 \cdot 3/8H_2O$  | C: 68.33; H: 6.26.          | C: 68.26; H: 6.07.          |
| <b>38</b> | $C_{23}H_{26}O_6$                | C: 69.33; H: 6.58           | C: 69.20; H: 6.60           |
| <b>39</b> | $C_{22}H_{23}NO_6 \cdot 3/2H_2O$ | C: 62.25; H: 6.17; N: 3.30. | C: 62.34; H: 5.98; N: 2.61. |
| <b>4</b>  | $C_{28}H_{30}O_8 \cdot 1/4H_2O$  | C, 67.39; H, 6.16.          | C, 67.50; H, 6.16.          |
| <b>40</b> | $C_{36}H_{42}O_{10}$             | C, 68.12; H, 6.67.          | C, 67.82; H, 6.73.          |
| <b>41</b> | $C_{26}H_{26}O_8 \cdot 11/8H_2O$ | C, 63.58; H, 5.90.          | C, 63.69; H, 6.19.          |
| <b>42</b> | $C_{27}H_{28}O_8 \cdot 1/4H_2O$  | C, 66.86; H, 5.92.          | C, 66.93; H, 6.27.          |
| <b>43</b> | $C_{28}H_{31}NO_7 \cdot 3/2H_2O$ | C, 64.60; H, 6.58.          | C, 64.65; H, 6.61.          |
| <b>44</b> | $C_{26}H_{25}NO_6 \cdot 9/4H_2O$ | C, 63.99; H, 6.09.          | C, 63.92; H, 6.00.          |
| <b>45</b> | $C_{26}H_{28}O_7 \cdot 3/4H_2O$  | C, 67.01; H, 6.38.          | C, 67.18; H, 6.44.          |
| <b>46</b> | $C_{23}H_{22}O_7$                | C: 67.31; H: 5.40           | C: 67.80; H: 5.64           |
| <b>47</b> | $C_{36}H_{44}FO_{10}$            | C, 66.04; H, 6.62.          | C, 66.08; H, 6.98.          |
| <b>48</b> | $C_{26}H_{27}FO_8 \cdot 3/4H_2O$ | C, 63.31; H, 5.67.          | C, 63.58; H, 5.99.          |
| <b>50</b> | $C_{24}H_{25}FO_6 \cdot 5/2H_2O$ | C: 60.88; H: 6.39           | C: 60.51; H: 6.15           |

---
